# Supplementary material for: Essential Indicators Identifying Chronic Inorganic Mercury Intoxication: Pooled Analysis across Multiple Cross-Sectional Studies
Source: PubMed Central journal article supplement (PMC5004870; doi:10.1371/journal.pone.0160323), 2016-08-30
Supplement: pone.0160323.s001.pdf [file pone.0160323.s001.pdf]

Additional file 1: Pre-and post-imputation descriptives of all study variables

| Variable                                | Pre-imputation |              | Post imputation (N=884) |        | NA (%) |
|-----------------------------------------|----------------|--------------|-------------------------|--------|--------|
|                                         | Mean (SD)      | N (%)        | Mean (SD)               | %      |        |
| <b>Gender</b>                           |                |              |                         |        | 0.0 %  |
| Male                                    |                | 512 (57.9 %) |                         | 57.9 % |        |
| Female                                  |                | 372 (42.1 %) |                         | 42.1 % |        |
| <b>Hg in urine (µg/l)</b>               | 42.75 (216.29) |              | 42.83 (215.90)          |        | 0.3 %  |
| <b>Hg in blood (µg/l)</b>               | 12.56 (28.67)  |              | 12.70 (28.75)           |        | 0.6 %  |
| <b>Hg in hair (µg/g)</b>                | 7.39 (35.18)   |              | 7.66 (34.1)             |        | 8.5 %  |
| <b>Hg urine/crea (µg/g)</b>             | 22.68 (82.45)  |              | 22.64 (82.25)           |        | 0.6 %  |
| <b>Exposure group</b>                   |                |              |                         |        | 0.0 %  |
| Control                                 |                | 100 (11.3 %) |                         | 11.3 % |        |
| low exposed                             |                | 255 (28.8 %) |                         | 28.8 % |        |
| medium exposed                          |                | 149 (16.9 %) |                         | 16.9 % |        |
| high exposed                            |                | 380 (43.0 %) |                         | 43.0 % |        |
| <b>Metallic taste</b>                   |                |              |                         |        | 0.0 %  |
| No                                      |                | 788 (89.1 %) |                         | 89.1 % |        |
| Yes                                     |                | 96 (10.9 %)  |                         | 10.9 % |        |
| <b>Excessive salivation</b>             |                |              |                         |        | 0.0 %  |
| No                                      |                | 751 (85.0 %) |                         | 85.0 % |        |
| Yes                                     |                | 133 (15.0 %) |                         | 15.0 % |        |
| <b>Sleep disturbances</b>               |                |              |                         |        | 0.0 %  |
| No                                      |                | 690 (78.1 %) |                         | 78.1 % |        |
| Yes                                     |                | 194 (21.9 %) |                         | 21.9 % |        |
| <b>Loss of hair</b>                     |                |              |                         |        | 1.7 %  |
| No                                      |                | 744 (85.6 %) |                         | 85.7 % |        |
| Yes                                     |                | 125 (14.4 %) |                         | 14.3 % |        |
| <b>Tremor at work</b>                   |                |              |                         |        | 0.1 %  |
| No                                      |                | 759 (86.0 %) |                         | 86.0 % |        |
| Yes                                     |                | 124 (14.0 %) |                         | 14.0 % |        |
| <b>Feel nervous</b>                     |                |              |                         |        | 0.2 %  |
| No                                      |                | 793 (89.9 %) |                         | 89.8 % |        |
| Yes                                     |                | 89 (10.1 %)  |                         | 10.2 % |        |
| <b>Palpitations</b>                     |                |              |                         |        | 0.1 %  |
| No                                      |                | 738 (83.6 %) |                         | 83.5 % |        |
| Yes                                     |                | 145 (16.4 %) |                         | 16.5 % |        |
| <b>Headache</b>                         |                |              |                         |        | 0.2 %  |
| No                                      |                | 635 (72.0 %) |                         | 72.0 % |        |
| Yes                                     |                | 247 (28.0 %) |                         | 28.0 % |        |
| <b>Nausea</b>                           |                |              |                         |        | 0.1 %  |
| No                                      |                | 757 (85.7 %) |                         | 85.7 % |        |
| Yes                                     |                | 126 (14.3 %) |                         | 14.3 % |        |
| <b>Feel numbness, pricking, aching</b>  |                |              |                         |        | 0.0 %  |
| No                                      |                | 681 (77 %)   |                         | 77 %   |        |
| Yes                                     |                | 203 (23 %)   |                         | 23 %   |        |
| <b>Tired easily</b>                     |                |              |                         |        | 0.0 %  |
| No                                      |                | 670 (75.8 %) |                         | 75.8 % |        |
| Yes                                     |                | 214 (24.2 %) |                         | 24.2 % |        |
| <b>Need to rest more</b>                |                |              |                         |        | 0.2 %  |
| No                                      |                | 730 (82.8 %) |                         | 82.7 % |        |
| Yes                                     |                | 152 (17.2 %) |                         | 17.3 % |        |
| <b>Feel sleepy or drowsy</b>            |                |              |                         |        | 0.1 %  |
| No                                      |                | 745 (84.4 %) |                         | 84.3 % |        |
| Yes                                     |                | 138 (15.6 %) |                         | 15.7 % |        |
| <b>No longer able to start anything</b> |                |              |                         |        | 0.5 %  |
| No                                      |                | 845 (96.0 %) |                         | 96.0 % |        |
| Yes                                     |                | 35 (4.0 %)   |                         | 4.0 %  |        |
| <b>Always lack energy</b>               |                |              |                         |        | 0.1 %  |
| No                                      |                | 730 (82.7 %) |                         | 82.6 % |        |

|                                                        |  |              |  |             |       |
|--------------------------------------------------------|--|--------------|--|-------------|-------|
| Yes                                                    |  | 153 (17.3 %) |  | 17.4 %      |       |
| <b>Less strength in muscles</b>                        |  |              |  |             |       |
| No                                                     |  | 734 (83.1 %) |  | 83.1 %      | 0.1 % |
| Yes                                                    |  | 149 (16.9 %) |  | 16.9 %      |       |
| <b>Feel weak</b>                                       |  |              |  |             |       |
| No                                                     |  | 721 (81.7 %) |  | 81.7 %      | 0.2 % |
| Yes                                                    |  | 161 (18.3 %) |  | 18.3 %      |       |
| <b>Get weak as go on</b>                               |  |              |  |             |       |
| No                                                     |  | 747 (84.5 %) |  | 84.5 %      | 0.0 % |
| Yes                                                    |  | 137 (15.5 %) |  | 15.5 %      |       |
| <b>Concentrating problems</b>                          |  |              |  |             |       |
| No                                                     |  | 760 (86.1 %) |  | 86.0 %      | 0.1 % |
| Yes                                                    |  | 123 (13.9 %) |  | 14.0 %      |       |
| <b>Problems to think clear</b>                         |  |              |  |             |       |
| No                                                     |  | 810 (91.6 %) |  | 91.6 %      | 0.0 % |
| Yes                                                    |  | 74 (8.4 %)   |  | 8.4 %       |       |
| <b>Problems to find correct words</b>                  |  |              |  |             |       |
| No                                                     |  | 849 (96.1 %) |  | 96.2 %      | 0.1 % |
| Yes                                                    |  | 34 (3.9 %)   |  | 3.8 %       |       |
| <b>Problems with eyestrain</b>                         |  |              |  |             |       |
| No                                                     |  | 731 (82.8 %) |  | 82.8 %      | 0.1 % |
| Yes                                                    |  | 152 (17.2 %) |  | 17.2 %      |       |
| <b>Memory problems</b>                                 |  |              |  |             |       |
| No                                                     |  | 665 (75.6 %) |  | 75.5 %      | 0.5 % |
| Yes                                                    |  | 215 (24.4 %) |  | 24.5 %      |       |
| <b>Teeth with amalgam fillings</b>                     |  |              |  |             |       |
| No                                                     |  | 883 (99.9 %) |  | 99.9 %      | 0.0 % |
| Yes                                                    |  | 1 (0.1 %)    |  | 0.1 %       |       |
| <b>Grey to bluish discoloration of the oral cavity</b> |  |              |  |             |       |
| No                                                     |  | 719 (81.3 %) |  | 81.3 %      | 0.0 % |
| Yes                                                    |  | 165 (18.7 %) |  | 18.7 %      |       |
| <b>Ataxia of gait (walking)</b>                        |  |              |  |             |       |
| No                                                     |  | 640 (72.4 %) |  | 72.4 %      | 0.0 % |
| Yes                                                    |  | 244 (27.6 %) |  | 27.6 %      |       |
| <b>Finger to nose tremor</b>                           |  |              |  |             |       |
| No                                                     |  | 827 (93.6 %) |  | 93.6 %      | 0.0 % |
| Yes                                                    |  | 57 (6.4 %)   |  | 6.4 %       |       |
| <b>Dysdiadochokinesis</b>                              |  |              |  |             |       |
| No                                                     |  | 627 (70.9 %) |  | 70.9 %      | 0.0 % |
| Yes                                                    |  | 257 (29.1 %) |  | 29.1 %      |       |
| <b>Heel to shin ataxia</b>                             |  |              |  |             |       |
| No                                                     |  | 669 (75.9 %) |  | 75.9 %      | 0.2 % |
| Yes                                                    |  | 213 (24.1 %) |  | 24.1 %      |       |
| <b>Heel to shin intentional</b>                        |  |              |  |             |       |
| No                                                     |  | 872 (98.9 %) |  | 98.8 %      | 0.2 % |
| Yes                                                    |  | 10 (1.1 %)   |  | 1.2 %       |       |
| <b>Mentolabial reflex</b>                              |  |              |  |             |       |
| No                                                     |  | 684 (77.6 %) |  | 77.5 %      | 0.2 % |
| Yes                                                    |  | 198 (22.4 %) |  | 22.5 %      |       |
| <b>Bradykinesia</b>                                    |  |              |  |             |       |
| No                                                     |  | 779 (88.4 %) |  | 88.4 %      | 0.3 % |
| Yes                                                    |  | 102 (11.6 %) |  | 11.6 %      |       |
| <b>Hypomimia</b>                                       |  |              |  |             |       |
| No                                                     |  | 785 (89.1 %) |  | 89.1 %      | 0.3 % |
| Yes                                                    |  | 96 (10.9 %)  |  | 10.9 %      |       |
| <b>Proteinuria</b>                                     |  |              |  |             |       |
| No                                                     |  | 784 (88.9 %) |  | 88.9 %      | 0.2 % |
| Yes                                                    |  | 98 (11.1 %)  |  | 11.1 %      |       |
| <b>Matchbox test</b>                                   |  | 20.81 (5.51) |  | 20.82 (5.5) | 0.3 % |

|                                            |               |              |               |        |       |
|--------------------------------------------|---------------|--------------|---------------|--------|-------|
| <b>Pencil tapping test</b>                 | 52.1 (11.99)  |              | 52.09 (11.98) |        | 0.7 % |
| <b>Age (years)</b>                         | 27.66 (12.29) |              | 27.66 (12.29) |        | 0.0 % |
| <b>Height (cm)</b>                         | 157.38 (12.9) |              | 157.35 (12.8) |        | 2.5 % |
| <b>Weight (kg)</b>                         | 53.7 (14.8)   |              | 53.68 (14.73) |        | 2.5 % |
| <b>Years in area (years)</b>               | 10.59 (10.54) |              | 10.66 (10.37) |        | 5.2 % |
| <b>Storing Hg at home</b>                  |               |              |               |        | 1.1 % |
| Never                                      |               | 311 (35.6 %) |               | 35.7 % |       |
| At work                                    |               | 169 (19.3 %) |               | 19.3 % |       |
| At home                                    |               | 394 (45.1 %) |               | 45.0 % |       |
| <b>Working cloth at home</b>               |               |              |               |        | 0.2 % |
| No                                         |               | 270 (30.6 %) |               | 30.6 % |       |
| Yes                                        |               | 612 (69.4 %) |               | 69.4 % |       |
| <b>Years,working with Hg</b>               | 3.12 (4.58)   |              | 3.12 (4.58)   |        | 0.0 % |
| <b>Is a smoker</b>                         |               |              |               |        | 0.9 % |
| No                                         |               | 657 (75 %)   |               | 74.8 % |       |
| Yes                                        |               | 219 (25 %)   |               | 25.2 % |       |
| <b>Drinks alcohol</b>                      |               |              |               |        | 0.1 % |
| No                                         |               | 716 (81.1 %) |               | 81.0 % |       |
| Yes                                        |               | 167 (18.9 %) |               | 19.0 % |       |
| <b>Handling with insecticides</b>          |               |              |               |        | 0.2 % |
| No                                         |               | 485 (55 %)   |               | 55 %   |       |
| Yes                                        |               | 397 (45 %)   |               | 45 %   |       |
| <b>Medical history of malaria</b>          |               |              |               |        | 0.0 % |
| No                                         |               | 360 (40.7 %) |               | 40.7 % |       |
| Yes                                        |               | 524 (59.3 %) |               | 59.3 % |       |
| <b>Fish consumption</b>                    |               |              |               |        | 0.8 % |
| None or low                                |               | 119 (13.6 %) |               | 13.5 % |       |
| Medium or high                             |               | 758 (86.4 %) |               | 86.5 % |       |
| <b>Consumes local chicken</b>              |               |              |               |        | 0.1 % |
| Never                                      |               | 87 (9.9 %)   |               | 9.8 %  |       |
| >= once a month                            |               | 332 (37.6 %) |               | 37.7 % |       |
| >= once a week                             |               | 370 (41.9 %) |               | 41.8 % |       |
| >= once a day                              |               | 94 (10.6 %)  |               | 10.6 % |       |
| <b>Consumes local meat</b>                 |               |              |               |        | 0.6 % |
| Never                                      |               | 108 (12.3 %) |               | 12.3 % |       |
| ≥ once a month                             |               | 351 (39.9 %) |               | 39.9 % |       |
| ≥ once a week                              |               | 330 (37.5 %) |               | 37.5 % |       |
| ≥ once a day                               |               | 90 (10.2 %)  |               | 10.2 % |       |
| <b>Consumes local vegetables or fruits</b> |               |              |               |        | 0.0 % |
| Never                                      |               | 53 (6.0 %)   |               | 6.0 %  |       |
| ≥ once a month                             |               | 25 (2.8 %)   |               | 2.8 %  |       |
| ≥ once a week                              |               | 155 (17.5 %) |               | 17.5 % |       |
| ≥ once a day                               |               | 651 (73.6 %) |               | 73.6 % |       |
| <b>Quadrizeps reflex (knee)</b>            |               |              |               |        | 0.1 % |
| No                                         |               | 720 (81.5 %) |               | 81.5 % |       |
| Yes                                        |               | 163 (18.5 %) |               | 18.5 % |       |
| <b>Achilles reflex (ankle jerk)</b>        |               |              |               |        | 0.6 % |
| No                                         |               | 584 (66.4 %) |               | 66.4 % |       |
| Yes                                        |               | 295 (33.6 %) |               | 33.6 % |       |
| <b>Visual field (radian)</b>               | 2.87 (0.24)   |              | 2.87 (0.24)   |        | 1.9 % |
| <b>Health problems</b>                     |               |              |               |        | 0.2 % |
| No                                         |               | 846 (95.9 %) |               | 95.9 % |       |
| Yes                                        |               | 36 (4.1 %)   |               | 4.1 %  |       |
