# Supplementary material for: Essential Indicators Identifying Chronic Inorganic Mercury Intoxication: Pooled Analysis across Multiple Cross-Sectional Studies
Source: PubMed Central journal article supplement (PMC5004870; doi:10.1371/journal.pone.0160323), 2016-08-30
Supplement: pone.0160323.s002.pdf [file pone.0160323.s002.pdf]

Additional file 2: Model 1 and 2 after stepwise variable selection in logistic regression

| Indicator                              |                     | Pre- imputation                          | Post- imputation                          |                                            |                                           |                                           |                                           | Pooled estimates<br>**     |
|----------------------------------------|---------------------|------------------------------------------|-------------------------------------------|--------------------------------------------|-------------------------------------------|-------------------------------------------|-------------------------------------------|----------------------------|
|                                        |                     | Complete case<br>OR (95% CI)             | 1 <sup>st</sup> imputation<br>OR (95% CI) | 2 <sup>nd</sup> imputation<br>OR (95% CI)  | 3 <sup>rd</sup> imputation<br>OR (95% CI) | 4 <sup>th</sup> imputation<br>OR (95% CI) | 5 <sup>th</sup> imputation<br>OR (95% CI) |                            |
| Ataxia of gait                         | No*                 | 1                                        | 1                                         | 1                                          | 1                                         | 1                                         | 1                                         | 1                          |
|                                        | Yes                 | 5.23 (2.52-10.86)                        | 4.61 (2.43- 8.74)                         | 5.24 (2.81-9.76)                           | 4.55 (2.39-8.67)                          | 5.84 (3.01-11.35)                         | 4.36 (2.3-8.24)                           | 4.89 (2.45-9.77)           |
| Heel to shin                           | No*                 | 1                                        | 1                                         | 1                                          | 1                                         | 1                                         | 1                                         | 1                          |
|                                        | Yes                 | 7.5 (3.54-15.88)                         | 5.93 (3.02-11.64)                         | 5.43 (2.84-10.38)                          | 6.98 (3.5-13.91)                          | 6.89 (3.42-13.85)                         | 5.57 (2.86-10.84)                         | 6.12 (2.98-12.60)          |
| Grey to bluish<br>discoloration of the | No*                 | 1                                        | 1                                         | 1                                          | 1                                         | 1                                         | 1                                         | 1                          |
|                                        | Yes                 | 7.27 (3.01-17.57)                        | 6.23 (2.87-13.53)                         | 5.59 (2.66-11.77)                          | 8.16 (3.71-17.94)                         | 8.08 (3.63-17.96)                         | 7.24 (3.36-15.61)                         | 6.98 (2.98-16.38)          |
| Dysdiadochokin<br>esis                 | No*                 | 1                                        | 1                                         | 1                                          | 1                                         | 1                                         | 1                                         | 1                          |
|                                        | Yes                 | 8.16 (3.8-17.53)                         | 7.46 (3.79-14.67)                         | 5.7 (3-10.85)                              | 7.97 (3.99-15.92)                         | 7.81 (3.86-15.78)                         | 6.36 (3.28-12.36)                         | 7.00 (3.33-14.74)          |
| Excessive                              | No*                 | 1                                        | 1                                         | 1                                          | 1                                         | 1                                         | 1                                         | 1                          |
|                                        | Yes                 | 19.43 (7.22-                             | 18.95 (8.01-44.85)                        | 16.86 (7.32-38.85)                         | 17.08 (7.12-40.96)                        | 23.57 (9.37-59.27)                        | 15.86 (6.77-37.19)                        | 18.28 (7.20-46.40)         |
| Matchbox- test                         | ≤17                 | 1                                        | 1                                         | 1                                          | 1                                         | 1                                         | 1                                         | 1                          |
|                                        | >17                 | 8.99 (3.66-22.05)                        | 7.40 (3.41-16.07)                         | 6.42 (3.03-13.59)                          | 8.31 (3.79-18.24)                         | 8.06 (3.61-17.95)                         | 7.09 (3.27-15.38)                         | 7.42 (3.31-16.66)          |
| Proteinuria                            | No*                 | 1                                        | 1                                         | 1                                          | 1                                         | 1                                         | 1                                         | 1                          |
|                                        | Yes                 | 10.3 (3.73-28.41)                        | 10.70 (4.32-26.53)                        | 6.60 (2.81-15.49)                          | 10.44 (4.35-25.08)                        | 11.04 (4.46-27.29)                        | 8.75 (3.71-20.64)                         | 9.35 (3.46-25.23)          |
| Sleep                                  | No*                 | 1                                        | 1                                         | 1                                          | 1                                         | 1                                         | 1                                         | 1                          |
|                                        | Yes                 | 4.85 (2.17-10.84)                        | 4.81 (2.35-9.84)                          | 5.04 (2.52-10.06)                          | 4.13 (2.01-8.48)                          | 4.17 (2.01-8.64)                          | 5.03 (2.45-10.35)                         | 4.62 (2.19-9.74)           |
| Pencil tapping-<br>test                | ≤45                 | 1                                        | 1                                         | 1                                          | 1                                         | 1                                         | 1                                         | 1                          |
|                                        | >45                 | 13.9 (6.04-31.95)                        | 8.61 (4.28-17.30)                         | 7.17 (3.7-13.91)                           | 9.72 (4.82-19.61)                         | 10.14 (4.93-20.87)                        | 10.43 (5.17-21.04)                        | 9.13 (4.22-19.75)          |
| Tremor at work                         | No*                 | 1                                        | 1                                         | 1                                          | 1                                         | 1                                         | 1                                         | 1                          |
|                                        | Yes                 | 12.9 (4.9-33.96)                         | 9.27 3.95 21.76                           | 6.54 (2.92-14.63)                          | 9.96 (4.18-23.72)                         | 9.74 (4.12-23.02)                         | 8.49 (3.67-19.63)                         | 8.7 (3.46-21.88)           |
| Hg in hair<br>(µg/g)                   | ≤1*                 | 1                                        | 1                                         | 1                                          | 1                                         | 1                                         | 1                                         | 1                          |
|                                        | >1<br>to<br>598.85) | 108.63 (19.7-                            | 22.23 (6.65-74.34)                        | 11.24 (3.91-32.32)                         | 61.21 (14.04-<br>266.83)                  | 58.94 (17.63-<br>197.08)                  | 25.34 (7.38-86.98)                        | 29.63 (4.00-219.34)        |
|                                        | >5                  | 2096.27 (271.94-<br>16159.36)            | 341.31 (81.88-<br>1422.65)                | 140.2 (40.48-<br>485.57)                   | 1219.12 (219.6-<br>6767.86)               | 917.84 (220.2-<br>3825.79)                | 423.09 (98.65-<br>1814.48)                | 468.85 (43.41-<br>5063.98) |
| Hg in urine<br>(µg/l)                  | ≤7*                 | 1                                        | 1                                         |                                            | 1                                         | 1                                         | 1                                         | 1                          |
|                                        | >7<br>to            | 4.14 (1.69-10.15)                        | 4.78 (2.14-10.66)                         | 4.14 (1.92-8.92)                           | 3.47 (1.61-7.47)                          | 4.97 (2.23-11.09)                         | 3.63 (1.7-7.77)                           | 4.16 (1.77-9.77)           |
|                                        | >25                 | 78.55 (25.43-<br>242.64)                 | 64.00 (24.46-<br>167.43)                  | 59.62 (24.07-<br>147.68)                   | 41.89 (16.73-<br>104.91)                  | 64.52 (24.66-<br>168.81)                  | 47.15 (19.27-115.4)                       | 54.62 (19.64-<br>151.95)   |
| <b>BIC</b>                             |                     | <b>345.32</b>                            | <b>348.14</b>                             | <b>363.91</b>                              | <b>347.38</b>                             | <b>336.33</b>                             | <b>353.11</b>                             | <b>349.77 ***</b>          |
| * reference group                      |                     | ** calculated according to Rubin's rules |                                           | *** averaged over five imputation datasets |                                           |                                           |                                           |                            |
