# Supplementary material for: Essential Indicators Identifying Chronic Inorganic Mercury Intoxication: Pooled Analysis across Multiple Cross-Sectional Studies
Source: PubMed Central journal article supplement (PMC5004870; doi:10.1371/journal.pone.0160323), 2016-08-30
Supplement: pone.0160323.s003.pdf [file pone.0160323.s003.pdf]

**Additional file 3. Model 3 after stepwise variable selection in logistic regression**

| Indicator                                             |          | Pre- imputation                                 | Post- imputation                          |                                                   |                                           |                                           |                                           | Pooled estimates **<br>OR (95% CI) |
|-------------------------------------------------------|----------|-------------------------------------------------|-------------------------------------------|---------------------------------------------------|-------------------------------------------|-------------------------------------------|-------------------------------------------|------------------------------------|
|                                                       |          | Complete case<br>OR (95% CI)                    | 1 <sup>st</sup> imputation<br>OR (95% CI) | 2 <sup>nd</sup> imputation<br>OR (95% CI)         | 3 <sup>rd</sup> imputation<br>OR (95% CI) | 4 <sup>th</sup> imputation<br>OR (95% CI) | 5 <sup>th</sup> imputation<br>OR (95% CI) |                                    |
| Ataxia of gait<br>(walking)                           | No*      | 1                                               | 1                                         | 1                                                 | 1                                         | 1                                         | 1                                         | 1                                  |
|                                                       | Yes      | 6.55 (3.59-11.94)                               | 4.70 (2.75-8.04)                          | 5.84 (3.38-10.11)                                 | 4.40 (2.64-7.33)                          | 5.24 (3.04-9.04)                          | 4.94 (2.93-8.33)                          | 5.00 (2.80-8.95)                   |
| Heel to shin<br>ataxia                                | No*      | 1                                               | 1                                         | 1                                                 | 1                                         | 1                                         | 1                                         | 1                                  |
|                                                       | Yes      | 4.02 (2.17-7.46)                                | 3.34 (1.90-5.88)                          | 3.84 (2.16-6.83)                                  | 3.28 (1.91-5.63)                          | 3.64 (2.06-6.45)                          | 3.17 (1.83-5.49)                          | 3.45 (1.92-6.19)                   |
| Grey to bluish<br>discoloration of<br>the oral cavity | No*      | 1                                               | 1                                         | 1                                                 | 1                                         | 1                                         | 1                                         | 1                                  |
|                                                       | Yes      | 4.61 (2.27-9.35)                                | 4.12 (2.16-7.85)                          | 4.42 (2.31-8.47)                                  | 3.77 (2.05-6.93)                          | 4.49 (2.33-8.65)                          | 4.13 (2.22-7.69)                          | 4.18 (2.18-8.03)                   |
| Dysdiadochokin<br>esis                                | No*      | 1                                               | 1                                         | 1                                                 | 1                                         | 1                                         | 1                                         | 1                                  |
|                                                       | Yes      | 5.69 (3.06-10.58)                               | 5.13 (2.93-8.97)                          | 4.58 (2.62-8.02)                                  | 4.20 (2.49-7.09)                          | 4.49 (2.57-7.86)                          | 4.03 (2.37-6.87)                          | 4.47 (2.5-8)                       |
| Excessive<br>salivation                               | No*      | 1                                               | 1                                         | 1                                                 | 1                                         | 1                                         | 1                                         | 1                                  |
|                                                       | Yes      | 16.8 (7.51-37.57)                               | 13.24 (6.50-26.99)                        | 13.52 (6.61-27.66)                                | 9.09 (4.70-17.56)                         | 11.68 (5.73-23.80)                        | 9.81 (5.02-19.17)                         | 11.33 (5.13-25.00)                 |
| Loss of hair                                          | No*      | 1                                               | 1                                         | 1                                                 | 1                                         | 1                                         | 1                                         | 1                                  |
|                                                       | Yes      | 8.25 (3.49-19.53)                               | 5.94 (2.74-12.87)                         | 5.53 (2.55-12.02)                                 | 4.47 (2.18-9.19)                          | 6.33 (2.9-13.83)                          | 4.99 (2.39-10.41)                         | 5.41 (2.4-12.21)                   |
| Matchbox- test                                        | ≤17      | 1                                               | 1                                         | 1                                                 | 1                                         | 1                                         | 1                                         | 1                                  |
|                                                       | >17      | 4.10 (2.07-8.13)                                | 4.11 (2.18-7.73)                          | 3.81 (2.02-7.17)                                  | 3.50 (1.92-6.38)                          | 3.98 (2.11-7.54)                          | 3.49 (1.90-6.41)                          | 3.77 (1.98-7.17)                   |
| Proteinuria                                           | No*      | 1                                               | 1                                         | 1                                                 | 1                                         | 1                                         | 1                                         | 1                                  |
|                                                       | Yes      | 3.32 (1.49-7.40)                                | 3.60 (1.74-7.44)                          | 3.75 (1.80-7.81)                                  | 4.10 (2.04-8.23)                          | 4.65 (2.22-9.75)                          | 4.12 (2.03-8.37)                          | 4.03 (1.90-8.55)                   |
| Sleep<br>disturbances                                 | No*      | 1                                               | 1                                         | 1                                                 | 1                                         | 1                                         | 1                                         | 1                                  |
|                                                       | Yes      | 3.76 (1.96-7.18)                                | 2.97 (1.64-5.40)                          | 3.08 (1.69-5.59)                                  | 2.90 (1.63-5.13)                          | 2.87 (1.57-5.24)                          | 3.03 (1.70-5.40)                          | 2.97 (1.64-5.37)                   |
| Pencil tapping-<br>test                               | ≤45      | 1                                               | 1                                         | 1                                                 | 1                                         | 1                                         | 1                                         | 1                                  |
|                                                       | >45      | 4.02 (2.18-7.41)                                | 3.72 (2.13-6.50)                          | 3.75 (2.13-6.59)                                  | 3.63 (2.13-6.20)                          | 3.56 (2.03-6.26)                          | 3.85 (2.23-6.65)                          | 3.7 (2.12-6.46)                    |
| Hg in urine<br>(µg/l)                                 | ≤ 7*     | 1                                               | 1                                         | 1                                                 | 1                                         | 1                                         | 1                                         | 1                                  |
|                                                       | >7<br>to | 2.21 (0.75-6.46)                                | 2.44 (0.96-6.24)                          | 1.51 (0.58-3.92)                                  | 2.25 (0.91-5.55)                          | 3.01 (1.17-7.72)                          | 2.44 (0.98-6.06)                          | 2.28 (0.78-6.68)                   |
|                                                       | > 25     | 19.84 (5.45-<br>72.19)                          | 15.32 (4.88-48.14)                        | 10.96 (3.45-34.83)                                | 13.56 (4.48-41.04)                        | 19.06 (6-60.52)                           | 16.3 (5.31-50.07)                         | 14.79 (4.36-50.17)                 |
| Hg urine/crea<br>(µg/g)                               | ≤5*      | 1                                               | 1                                         |                                                   | 1                                         | 1                                         | 1                                         | 1                                  |
|                                                       | >5<br>to | 9.57 (3.06-29.91)                               | 5.92 (2.21-15.83)                         | 8.43 (3.05-23.32)                                 | 4.12 (1.61-10.54)                         | 5.32 (1.98-14.26)                         | 3.78 (1.47-9.73)                          | 5.29 (1.61-17.38)                  |
|                                                       | >20      | 26.5 (6.8-102.73)                               | 14.78 (4.53-48.27)                        | 20.34 (5.97-69.38)                                | 9.59 (3.11-29.62)                         | 13.21 (4.04-43.26)                        | 9.17 (2.93-28.64)                         | 12.84 (3.27-50.47)                 |
| <b>BIC</b>                                            |          | <b>453.26</b>                                   | <b>452.67</b>                             | <b>448.13</b>                                     | <b>491.16</b>                             | <b>446.32</b>                             | <b>477.01</b>                             | <b>463.06 ***</b>                  |
| <b>* reference group</b>                              |          | <b>** calculated according to Rubin's rules</b> |                                           | <b>*** averaged over five imputation datasets</b> |                                           |                                           |                                           |                                    |
